# Supplementary material
Source: Research Square preprint supplement (doi:10.21203/rs.3.rs-10116650/v1)
Supplement: Supplementary file 1 [file 93c5c625baa52a90d06f3b9a.docx]

# Appendix

**App. Tab. 2:** Consolidated criteria for reporting qualitative studies (COREQ): 32-item checklist

| No. Item | Guide questions/description | Reported on Page # |
| --- | --- | --- |
| Domain 1: Research team and reﬂexivity | | |
| Personal Characteristics | | |
| 1. Inter viewer/facilitator | Which author/s conducted the interview or focus group? | Page 4 |
| 2. Credentials | What were the researcher’s credentials? E.g. PhD, MD | N/A |
| 3. Occupation | What was their occupation at the time of the study? | N/A |
| 4. Gender | Was the researcher male or female? | N/A |
| 5. Experience and training | What experience or training did the researcher have? | N/A |
| Relationship with participants | | |
| 6. Relationship established | Was a relationship established prior to study commencement? | Page 4 |
| 7. Participant knowledge of the interviewer | What did the participants know about the researcher? e.g. personal goals, reasons for doing the research | N/A |
| 8. Interviewer characteristics | What characteristics were reported about the interviewer/facilitator? e.g. Bias, assumptions, reasons and interests in the research topic | N/A |
| Domain 2: study design | | |
| Theoretical framework | | |
| 9. Methodological orientation and Theory | What methodological orientation was stated to underpin the study? e.g. grounded theory, discourse analysis, ethnography, phenomenology, content analysis | Page 4 |
| Participant selection | | |
| 10. Sampling | How were participants selected? e.g. purposive, convenience, consecutive, snowball | Page 3-4 |
| 11. Method of approach | How were participants approached? e.g. face-to-face, telephone, mail, email | Page 3-4 |
| 12. Sample size | How many participants were in the study? | Page 4 |
| 13. Non-participation | How many people refused to participate or dropped out? Reasons? | N/A |
| Setting | | |
| 14. Setting of data collection | Where was the data collected? e.g. home, clinic, workplace | Page 3 |
| 15. Presence of non-participants | Was anyone else present besides the participants and researchers? | N/A |
| 16. Description of sample | What are the important characteristics of the sample? e.g. demographic data, date | Page 5-6, Table 1 |
| Data collection | | |
| 17. Interview guide | Were questions, prompts, guides provided by the authors? Was it pilot tested? | Page 3 |
| 18. Repeat interviews | Were repeat interviews carried out? If yes, how many? | N/A |
| 19. Audio/visual recording | Did the research use audio or visual recording to collect the data? | Page 4 |
| 20. Field notes | Were ﬁeld notes made during and/or after the interview or focus group? | Page 4 |
| 21. Duration | What was the duration of the interviews or focus group? | Page 4 |
| 22. Data saturation | Was data saturation discussed? | Page 4 |
| 23. Transcripts returned | Were transcripts returned to participants for comment and/or correction? | N/A |
| Domain 3: analysis and ﬁndings | | |
| Data analysis | | |
| 24. Number of data coders | How many data coders coded the data? | Page 4 |
| 25. Description of the coding tree | Did authors provide a description of the coding tree? | Page 6, Figure 1 |
| 26. Derivation of themes | Were themes identiﬁed in advance or derived from the data? | Page 4 |
| 27. Software | What software, if applicable, was used to manage the data? | Page 4 |
| 28. Participant checking | Did participants provide feedback on the ﬁndings? | N/A |
| Reporting | | |
| 29. Quotations presented | Were participant quotations presented to illustrate the themes/ﬁndings? Was each quotation identiﬁed? e.g. participant number | Page 7-16 |
| 30. Data and ﬁndings consistent | Was there consistency between the data presented and the ﬁndings? | Page 7-16 |
| 31. Clarity of major themes | Were major themes clearly presented in the ﬁndings? | Page 7-16 |
| 32. Clarity of minor themes | Is there a description of diverse cases or discussion of minor themes? | N/A |

**App. Tab. 3**: Interview guideline

| **Theme** | **Open Questions** | **Follow-Up Questions** |
| --- | --- | --- |
| Prior Experience | Do you have any prior experience with shared notes? | Did you ever use a tool like Open Notes before? |
| Prior Expectations | Did you have any positive expectations before using open notes?  Did you have any negative expectations before using open notes? | Were there any concrete hopes, wishes or imagined benefits you had before using open notes?  Were there any concrete concerns or fears you had before using open notes?  According to our laws, the notes do not belong to the doctors but to the patients and the patients have a right to look at them.  Do you feel that getting to see your notes is your right or do you feel it’s more of a favor by your doctor? |
| Relationship with doctor | How would you describe the relationship with your doctor before using open notes? |  |
| Experience when reading open notes | How did you experience reading the notes? | Did you find the notes understandable? Were there any problems in comprehension?  If yes, how did you deal with it? Did you write or comment, did you talk to your doctor in person etc.?  What kind of thoughts and feelings did you experience when reading the notes?  Did you experience any unpleasant or difficult feelings when reading the notes?  How did you deal with these feelings?  Did you feel that the notes were an adequate representation of your conversation with the doctor?  If not, how did you feel about it and how did you react?  Did you ever feel like the doctor left something out, e.g. a difficult or sensitive topic you talked to them about?  Did you ever find any mistakes in the notes? If yes, how did you react, e.g. writing a comment, talking to the doctor about it during the next appointment? |
| Contact with Clinicians | Did you experience any changes in the relationship to your doctor due to open notes?  Did you ever feel the need to discuss entries with your doctor in person?  Did using open notes affect trust between you and your doctor?  Do you feel there were any changes in the process of decision making due to open notes?  Do you feel more involved in the process of decision making due to open notes? | E.g., were you in contact more or less frequently, were your appointments longer, shorter, more or less meaningful?  If yes, did you do it?  If yes, in which way and why?  If yes, in which way and why? |
| Consent, Transparency, and Adherence | Did using open notes affect your understanding of your illness?  Did using open notes have any effect on your motivation to seek treatment?  Do you think there is more transparency in regard to the treatment process due to open notes?  Did using open notes have any effect on the topics you decided to discuss with your doctor? | If yes, what do you think are the reasons for that?    If yes, what do you think are the reasons for that?  If yes, what are the reasons for that? What are the main effects of this change in transparency in your experience?  E.g. were there moments in which you decided against sharing certain information and what were the reasons for that decision? |
| Self-Management | Did using open notes help you to deal with your illness in any way? If yes, how? | In what way did using open notes have an influence on your experience of and behavior during doctors’ appointments?  Do you feel using open notes has helped you to prepare for doctors’ appointments?  Do you feel open notes has helped you to get a better overview of your history of illness and the treatment process in general? |
| Relatives | Did relatives or people close to you get access to your notes? | If yes, did they use it?  How would like the idea of your relatives having access to your shared documentation?  If you gave access, did you give access to all the notes or just to some parts of it?  If yes, why did you decide to do that? If no, why would you not want that?  If you did share your notes, were there any challenges or difficulties due to your relatives sharing the notes?  What kind of feedback did you get from your relatives? |
| Comment function | Did you use the comment function? (Chat)          Did using the comment function have any effect on the way you communicated with your doctor?          Did using the comment function have any effect on the relationship with your doctor?  Did you feel like using the comment function influenced your treatment, especially the quality of your treatment? | If yes, what did you use it for?  - Ask a question  - Write notes for yourself  - Organization e.g. appointments  - Talk to the doctor about mistakes  Did using the comment function lead to better communication? Was communication quicker or more direct? Were you more frequently in contact? Did you feel like the contact itself was more intense or more interactive?  Was it easier to contact your doctor using the comment function?  Did you experience any challenges or difficulties using the comment function?  Do you see any chances for your treatment in general by using the comment function?  How long did it take the doctor to answer your comment? If yes, how did that affect the quality of your treatment? |
| Outlook | Would you like to continue using open notes? | If yes, is there anything you would like to change? |
| Conclusion | In what way were your expectations you told me about in the beginning fulfilled?  Would you like to draw a personal conclusion or is there anything else you would like to add or share at this point? |  |
